# Supplementary material
Source: Springer Nature journal article supplement (https://www.springerprofessional.de/resource/supplementary/13638_2014_963_MOESM18_ESM.pdf/11898886)
Supplement: MOESM18 [file 11898886]

# Classification Accuracy

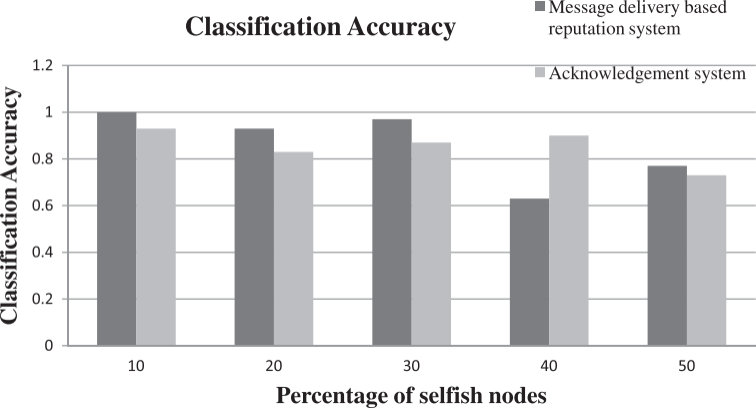

■ Message delivery based reputation system

■ Acknowledgement system

Classification Accuracy

10

20

30

40

50

Percentage of selfish nodes
